# Supplementary material for: The Effect of Dentine Desensitizing Agents on the Retention of Cemented Fixed Dental Prostheses: A Systematic Review
Source: MDPI journal article supplement (doi:10.3390/medicina59030515), 2023-03-06
Supplement: s1 [file s1]

**Supplementary Table S1.** Search strategy for the electronic databases.

| Electronic database | Search strategy and search terms                                                                                                                                                                                                                                                                                                                                                                                                                                                                                                                                                                                                                                                                                                                                                                                                                                                                                                                                                                                                                                                                                                                         | Number of Titles |
|---------------------|----------------------------------------------------------------------------------------------------------------------------------------------------------------------------------------------------------------------------------------------------------------------------------------------------------------------------------------------------------------------------------------------------------------------------------------------------------------------------------------------------------------------------------------------------------------------------------------------------------------------------------------------------------------------------------------------------------------------------------------------------------------------------------------------------------------------------------------------------------------------------------------------------------------------------------------------------------------------------------------------------------------------------------------------------------------------------------------------------------------------------------------------------------|------------------|
| MEDLINE-PUBMED      | (("dental restoration, permanent"[MeSH Terms] OR "Dental Prosthesis"[MeSH Terms] OR crowns[MeSH Terms] OR "denture, partial, fixed"[MeSH Terms] OR "Dental cements"[MeSH Terms] OR "Resin cements"[MeSH Terms] OR "Complete cast crowns"[All Fields] OR "luting agent*"[All Fields] OR "Self-adhesive resin cement"[All Fields] OR "luting cement*"[All Fields] OR "Adhesive cementation"[All Fields] OR "glass ionomer cement"[All Fields] OR "adhesive resin cement"[All Fields] OR "Fixed dental prosthesis"[All Fields]) AND ("Dentin Desensitizing Agents"[MeSH Terms] OR "Dentine Desensitizing"[All Fields] OR "Desensitizing agents"[All Fields] OR "Dentin pretreatment"[All Fields] OR "Dentin desensitizer"[All Fields] OR "Desensitizing paste"[All Fields] OR (gluma[Supplementary Concept] OR gluma[All Fields] OR gluma[All Fields]) OR Systemp[All Fields]) AND ("Dental Prosthesis Retention"[MeSH Terms] OR "Prosthesis Retention"[MeSH Terms] OR "bond strength"[All Fields] OR Microtensile[All Fields] OR "tensile bond strength"[All Fields] OR "dentine bond strength"[All Fields])) AND ((humans[Filter]) AND (english[Filter])) | 176              |
|                     | #1 MeSH descriptor: [Dental Restoration, Permanent] explode all trees<br>#2 MeSH descriptor: [Dental Prosthesis] explode all trees<br>#3 MeSH descriptor: [Crowns] explode all trees<br>#4 MeSH descriptor: [Denture, Partial, Fixed] explode all trees<br>#5 MeSH descriptor: [Dental Cements] explode all trees<br>#6 MeSH descriptor: [Resin Cements] explode all trees<br>#7 "Complete cast crowns"<br>#8 "Luting agent*"<br>#9 "Self-adhesive resin cement"<br>#10 "luting cement*"<br>#11 "Adhesive cementation"<br>#12 "glass ionomer cement"<br>#13 "adhesive resin cement"                                                                                                                                                                                                                                                                                                                                                                                                                                                                                                                                                                      |                  |

|                  |                                                                                                                                                                                                                                                                                                                                                                                                                                                                                                                                                                                                                                                                                                                                                                                                                                                                                                                                 |      |
|------------------|---------------------------------------------------------------------------------------------------------------------------------------------------------------------------------------------------------------------------------------------------------------------------------------------------------------------------------------------------------------------------------------------------------------------------------------------------------------------------------------------------------------------------------------------------------------------------------------------------------------------------------------------------------------------------------------------------------------------------------------------------------------------------------------------------------------------------------------------------------------------------------------------------------------------------------|------|
| Cochrane Library | <p>#14 "Fixed dental prosthesis"</p> <p>#15 MeSH descriptor: [Dentin Desensitizing Agents] explode all trees</p> <p>#16 "Dentine Desensitizing"</p> <p>#17 "Desensitizing agents"</p> <p>#18 "Dentin pretreatment"</p> <p>#19 "Dentin desensitizer"</p> <p>#20 "Desensitizing paste"</p> <p>#21 Gluma</p> <p>#22 Systemp</p> <p>#23 MeSH descriptor: [Dental Prosthesis Retention] explode all trees</p> <p>#24 MeSH descriptor: [Prosthesis Retention] explode all trees</p> <p>#25 "bond strength"</p> <p>#26 Microtensile</p> <p>#27 "tensile bond strength"</p> <p>#28 "dentine bond strength"</p> <p>#29 ("microtensile bond strength"):ti,ab,kw</p> <p>#33</p> <p>#1 OR #2 OR #3 OR #4 OR #5 OR #6 #7 OR #8 OR #9<br/>OR #10 OR #11 OR #12 OR #13 OR #14</p> <p>#34</p> <p>#15 OR #16 OR #17 #18 OR #19 OR #20 #21 OR #22</p> <p>#35</p> <p>#23 OR #24 OR #25 OR #26 OR #27 OR #28 #29</p> <p>#36 #33 AND #34 AND #35</p> | 5    |
| Scopus           | <p>(( "dental restoration, permanent" OR "Dental Prosthesis" OR crowns OR "denture, partial, fixed" OR "Dental cements" OR "Resin cements" OR "Complete cast crowns" OR "luting agent*" OR "Self-adhesive resin cement" OR "luting cement*" OR "Adhesive cementation" OR "glass ionomer cement" OR "adhesive resin cement" OR "Fixed dental prosthesis" ) AND ( "Dentin Desensitizing Agents" OR "Dentine Desensitizing" OR "Desensitizing agents" OR "Dentin pretreatment" OR "Dentin desensitizer" OR "Desensitizing paste" OR gluma OR systemp ) AND ( "Dental Prosthesis Retention" OR "Prosthesis Retention" OR "bond strength" OR microtensile OR "tensile bond</p>                                                                                                                                                                                                                                                       | 1206 |

|                                  |                                                                                                                                                                                                                                                                                                                                                                                                                                                                                                                                                                                                                                                                                                                                   |    |
|----------------------------------|-----------------------------------------------------------------------------------------------------------------------------------------------------------------------------------------------------------------------------------------------------------------------------------------------------------------------------------------------------------------------------------------------------------------------------------------------------------------------------------------------------------------------------------------------------------------------------------------------------------------------------------------------------------------------------------------------------------------------------------|----|
|                                  | strength" OR "dentine bond strength" ) ) AND ( LIMIT-TO ( PUBSTAGE , "final" ) OR LIMIT-TO ( PUBSTAGE , "aip" ) ) AND ( LIMIT-TO ( DOCTYPE , "ar" ) OR LIMIT-TO ( DOCTYPE , "re" ) ) AND ( LIMIT-TO ( SUBJAREA , "DENT" ) OR LIMIT-TO ( SUBJAREA , "MATE" ) OR LIMIT-TO ( SUBJAREA , "HEAL" ) ) AND ( LIMIT-TO ( LANGUAGE , "English" ) )                                                                                                                                                                                                                                                                                                                                                                                         |    |
| Web of Science (Core Collection) | ((ALL=(( "dental restoration, permanent" OR "Dental Prosthesis" OR crowns OR "denture, partial, fixed" OR "Dental cements" OR "Resin cements" OR "Complete cast crowns" OR "luting agent*" OR "Self-adhesive resin cement" OR "luting cement*" OR "Adhesive cementation" OR "glass ionomer cement" OR "adhesive resin cement" OR "Fixed dental prosthesis" ) )) AND ALL=(( "Dentin Desensitizing Agents" OR "Dentine Desensitizing" OR "Desensitizing agents" OR "Dentin pretreatment" OR "Dentin desensitizer" OR "Desensitizing paste" OR gluma OR systemp ) )) AND ALL=(( "Dental Prosthesis Retention" OR "Prosthesis Retention" OR "bond strength" OR microtensile OR "tensile bond strength" OR "dentine bond strength" ) ) | 67 |
